# Supplementary material
Source: PubMed Central journal article supplement (PMC2830692)
Supplement: emboj2009369s2.pdf [file emboj2009369s2.pdf]

## Supplementary Figure 2

```
Homo sapiens      MVLESVARIVKVKQLPAYLKRLPVPESITGFARLTVSEWLRLLPFLGVLALLGYLAVRPFL 60
Mus musculus     MVLDSVARIVKVKQLPAYLKQLPVPDSITGFARLTVSDWLRLLPFLGVLALLGYLAVRPFF 60
Xenopus laevis   MMLESLARVFKVKQLPAYLKRLPIPDSIAGFIRLTVLEWLRLLPFLGVLALLGYLAIRPFL 60
Drosophila melanogaster --MEPISHLVKSSLPNYLSSLPVPDSIGGWFKLSFKDWLALIPPTVVVAGLGYTAYLAYC 58
Caenorhabditis elegans MTIAGFCALSLIQDHCCWT-TPQHCSVAELGTMPCPTQVSGRCVATTAAVLAGGALIGYL 59
      :  .. :  .  .  *  *:  :.  :  .  *  *  *  :

Homo sapiens      PKKKQ---QKDS-LINLKIQKENPKVVNEINIEDLCLTKAAYCRCWRSKTFPACDGSHNK 116
Mus musculus     PKKKQ---QKDS-LINLKIQKENPKVVNEINIEDLCLTKAAYCRCWRSKTFPACDGSHNK 116
Xenopus laevis   PKKKQ---QKDS-LINLKIQKENPKVVNEINIEDLHLAKAAYCRCWRSKTFPVCDGSHNK 116
Drosophila melanogaster PAARASCAAKNSGRCNNHIRKNEPKVVDMIDVEDIA-EKAAFCRCWKTKNWPYCDGSHGE 117
Caenorhabditis elegans VGYKFG---QRSARCNYKIQLDSNKIVDTVDIEDIG-EKKAFCRCWKSEKWPYCDGSHGK 115
      :      :  *  *  *:  :.  *:  *:  :::*:  *  *:*****:.....* *****.:

Homo sapiens      HNELTGDNVGPLILKKKEV 135
Mus musculus     HNELTGDNVGPLILKKKEV 135
Xenopus laevis   HNELTGDNVGPLILKKKEV 135
Drosophila melanogaster HNKQTGDNVGPVIVIKK--- 133
Caenorhabditis elegans HNKETGDNVGPLIVKSEKK 134
**: *****:***.
```
