# Supplementary material
Source: PubMed Central journal article supplement (PMC2830692)
Supplement: emboj2009369s8.pdf [file emboj2009369s8.pdf]

Manuscript EMBO-2009-71351

## **Antagonism of Beclin 1-dependent autophagy by BCL-2 at the endoplasmic reticulum requires NAF-1**

Natasha C. Chang, Mai Nguyen, Marc Germain, and Gordon C. Shore

*Corresponding author: Gordon C. Shore, McGill University*

---

### **Review timeline:**

Submission date:

12 May 2009

Accepted:

13 November 2009

---

### **Transaction Report:**

No Review Process File is available with this article, as the authors have chosen not to make the review process public in this case.
