# Supplementary material
Source: PubMed Central journal article supplement (PMC2830692)

# Supplementary Figure 1

**A)**

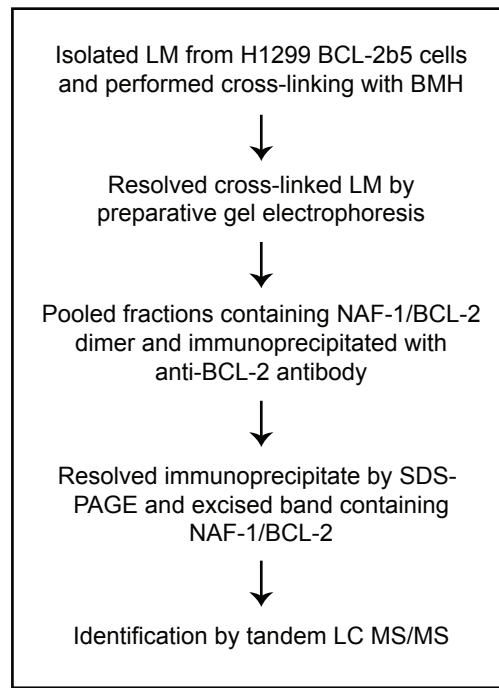

**B)**

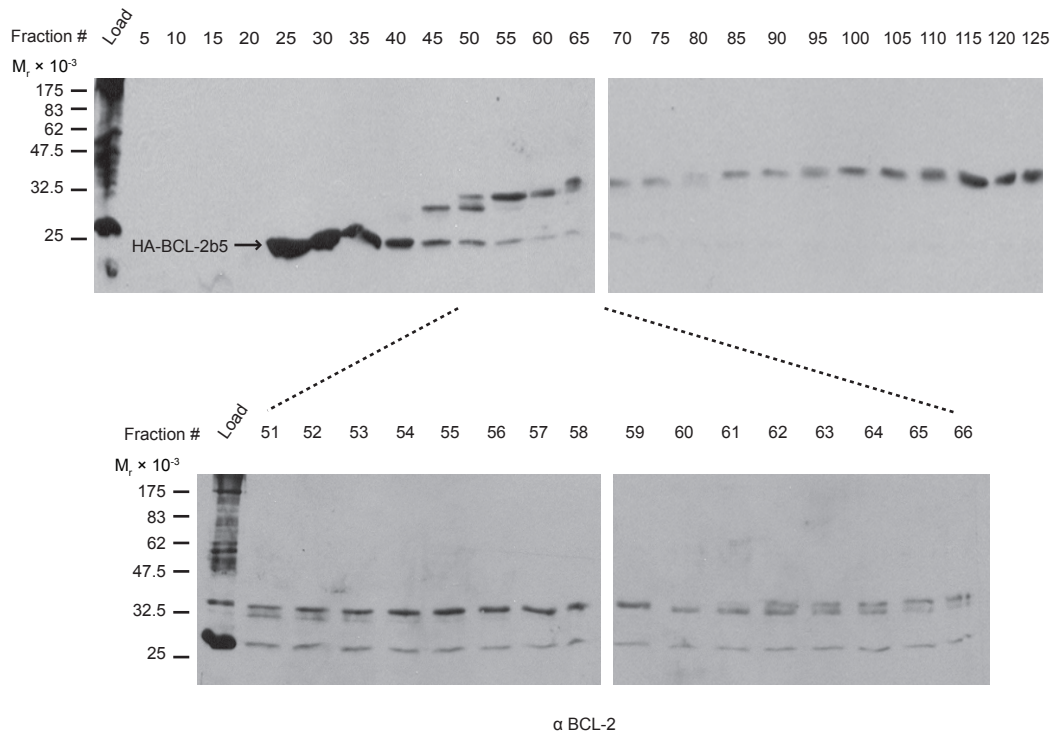

Supplement: emboj2009369s1.pdf [file emboj2009369s1.pdf]

### Supplementary Figure 3

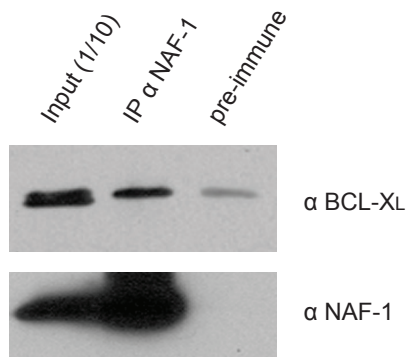

Lysate: H1299 neo

Supplement: emboj2009369s3.pdf [file emboj2009369s3.pdf]

## Supplementary Figure 4

IVT: NAF-1-Flag

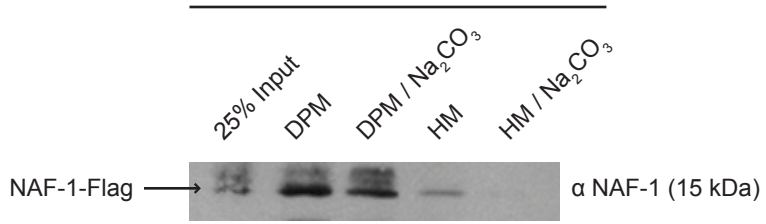

IVT: HA-BAK

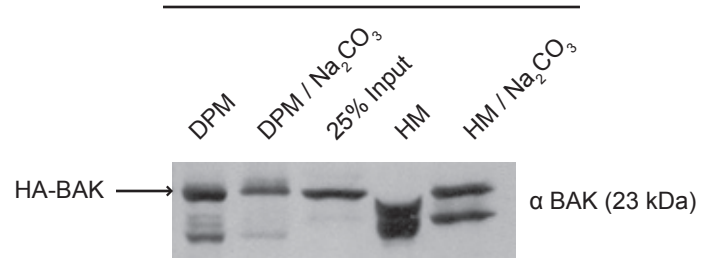

Supplement: emboj2009369s4.pdf [file emboj2009369s4.pdf]

## Supplementary Figure 5

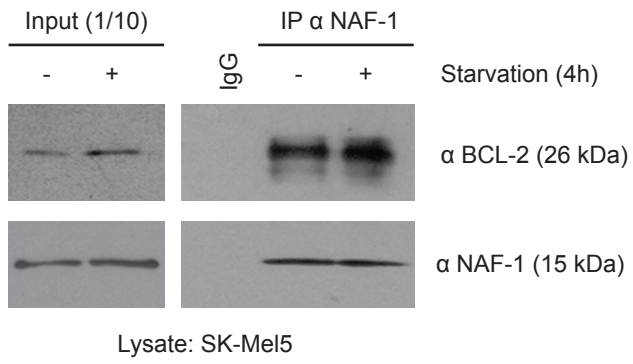

Supplement: emboj2009369s5.pdf [file emboj2009369s5.pdf]

# Supplementary Figure 6

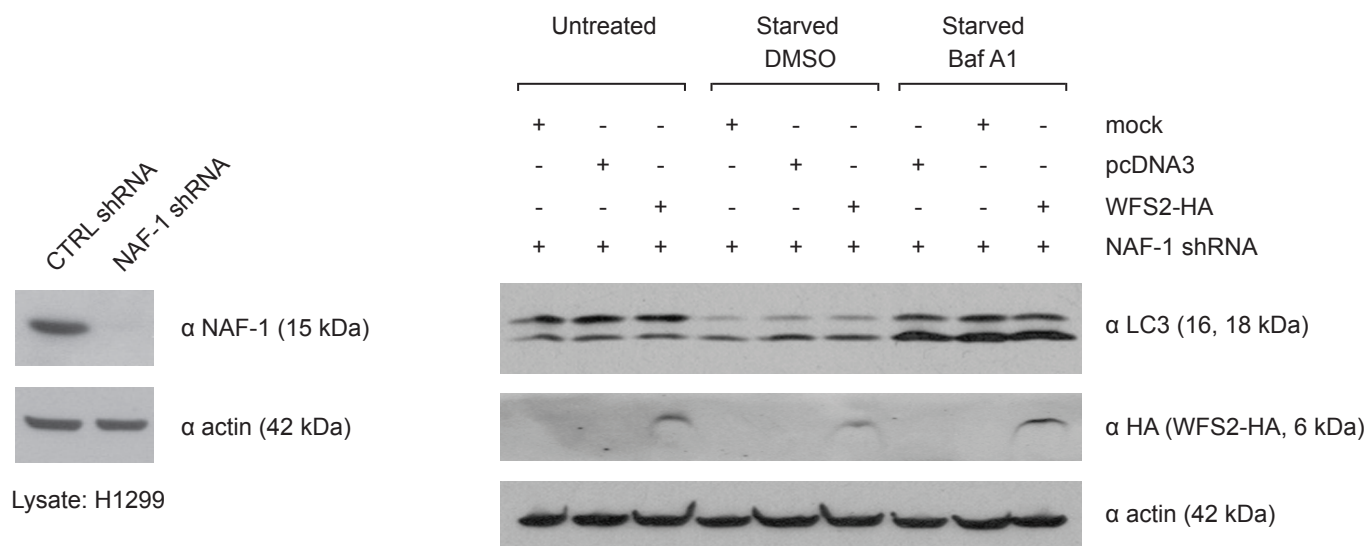

Supplement: emboj2009369s6.pdf [file emboj2009369s6.pdf]
